# Supplementary material for: Global scale variability of the mineral dust long-wave refractive index: a new dataset of in situ measurements for climate modeling and remote sensing
Source: Copernicus journal article supplement (doi:10.5194/acp-17-1901-2017), 2017-02-09
Supplement: Supplementary file 2 [file acp-17-1901-2017-supplement.zip]

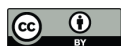

## *Supplement of*

# **Global scale variability of the mineral dust long-wave refractive index: a new dataset of in situ measurements for climate modeling and remote sensing**

**Claudia Di Biagio et al.**

*Correspondence to:* Claudia Di Biagio (cldibiagio@gmail.com) and Paola Formenti (paola.formenti@lisa.u-pec.fr)

- acp-17-1901-2017-supplement-title-page.pdf
- Supplementary
  - CRI\_results\_Algeria.txt
  - CRI\_results\_Arizona.txt
  - CRI\_results\_Atacama.txt
  - CRI\_results\_Australia.txt
  - CRI\_results\_Bodele.txt
  - CRI\_results\_Ethiopia.txt
  - CRI\_results\_Gobi.txt
  - CRI\_results\_Kuwait.txt
  - CRI\_results\_Libya.txt
  - CRI\_results\_Mali.txt
  - CRI\_results\_Mauritania.txt
  - CRI\_results\_Morocco.txt
  - CRI\_results\_Namib-1.txt
  - CRI\_results\_Namib-2.txt
  - CRI\_results\_Niger.txt
  - CRI\_results\_Patagonia.txt
  - CRI\_results\_SaudiArabia.txt
  - CRI\_results\_Taklimakan.txt
  - CRI\_results\_Tunisia.txt
  - DiBiagio\_et al\_ACP2017\_Supplementary.pdf

The copyright of individual parts of the supplement might differ from the CC-BY 3.0 licence.
